# Supplementary material for: Diurnal and eating-associated microbial patterns revealed via high-frequency saliva sampling
Source: HighWire-hosted journal article supplement (doi:10.1101/gr.276482.121), 2022-06-01
Supplement: Supplemental_Figure_S1.pdf [file Supplemental_Figure_S1.pdf]

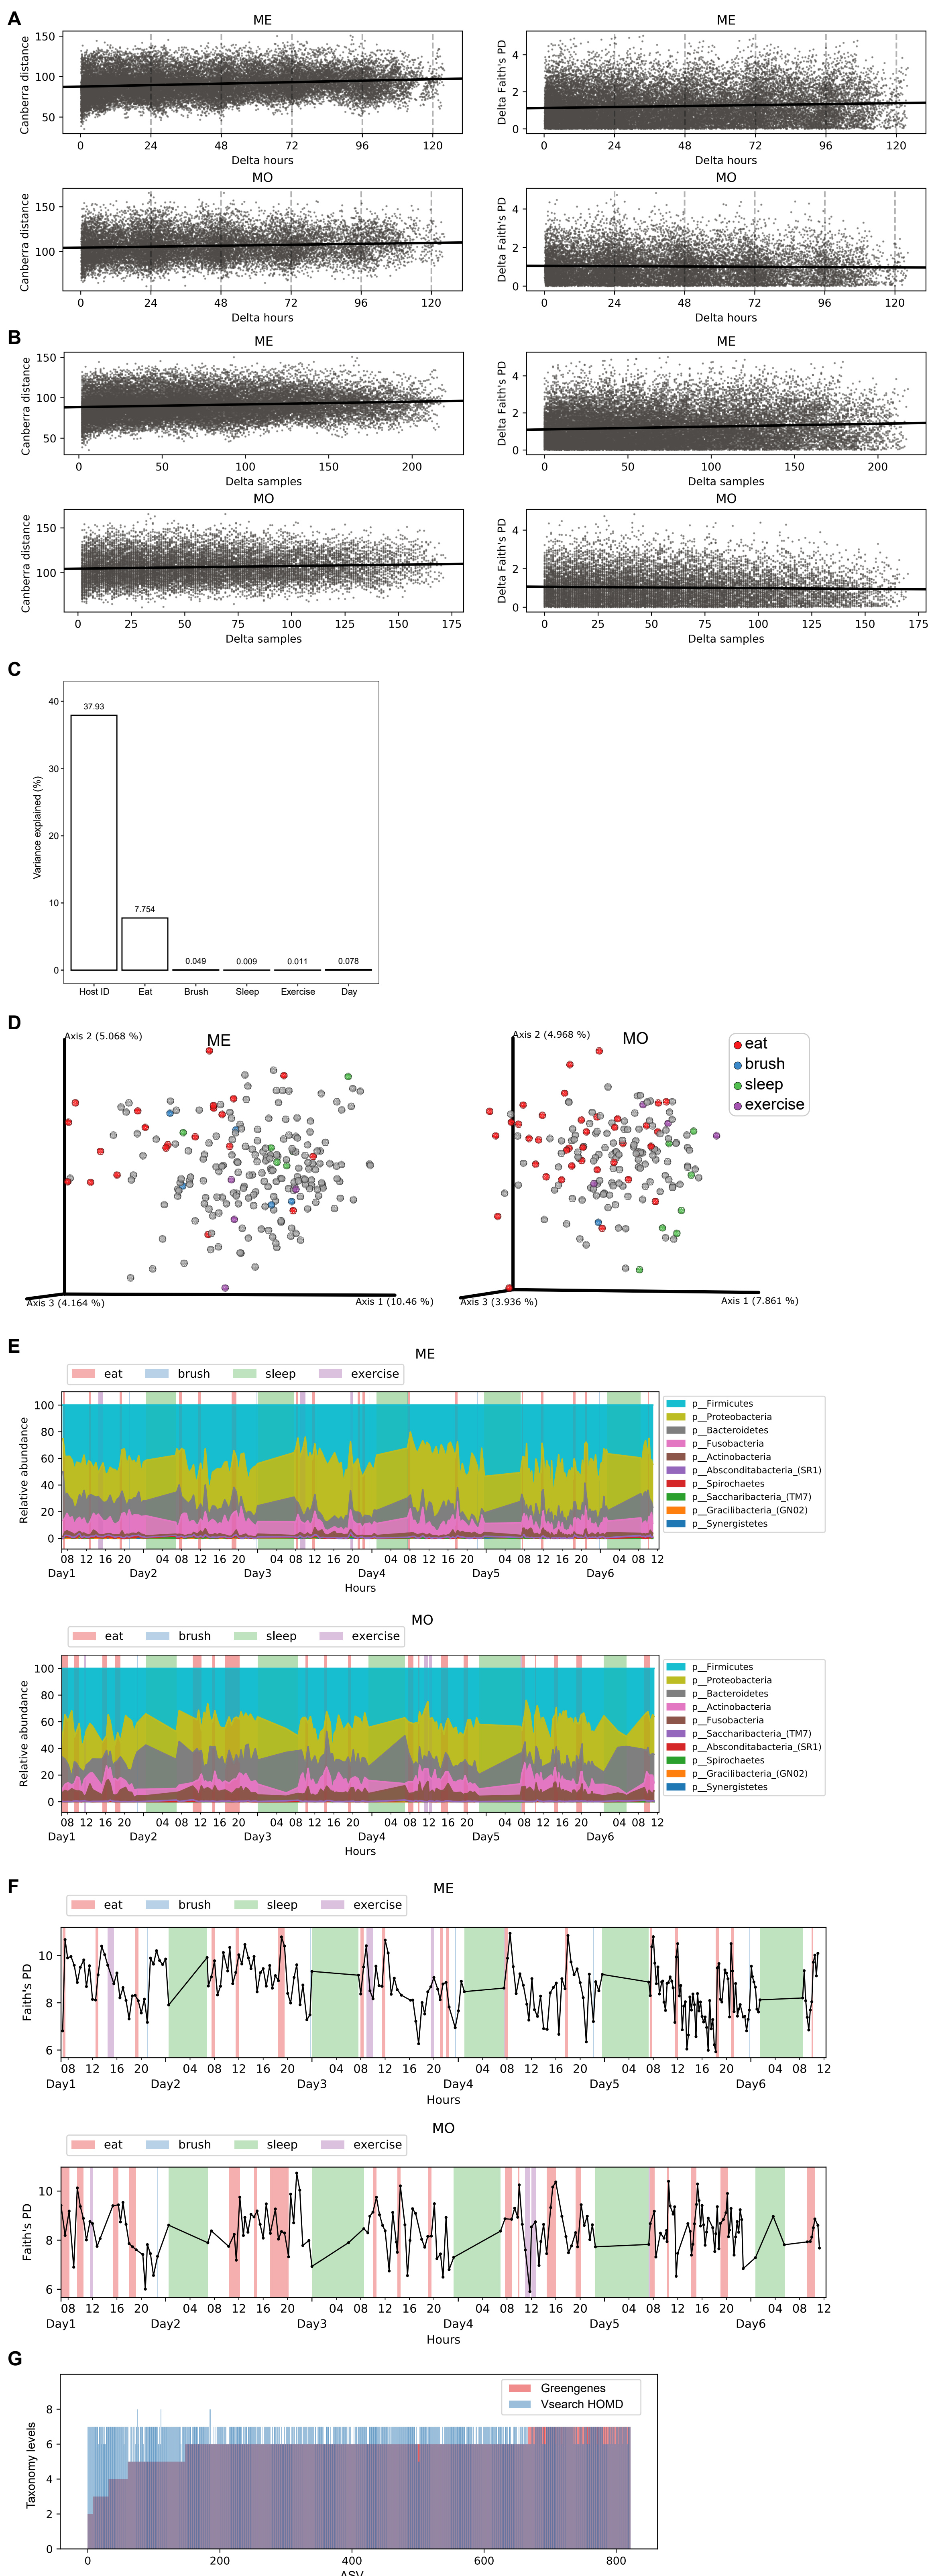

**Supplemental Figure S1.** The microbiome overview of densely sampled saliva samples in subject ME and MO. (A-B) The Canberra distance and delta in Faith's PD index between every two salivary samples in ME and MO. (C) Microbial composition variation explained by host ID, daily activities and sampling days. (D) The PCoA plots colored by activities in ME and MO. (E) Trace plots of phylum-level taxonomy composition in ME and MO. (F) Trace plots of alpha diversity in ME and MO. Activity windows were marked in different background colors. Red, blue, green, and purple represent eat, brush, sleep, and exercise activities, respectively. (G) Taxonomy assignment for oral ASVs generated better taxonomy resolution using HOMD database compared to Greengenes. Each bar on x-axis represents an ASV and y-axis is the highest taxonomy level each ASV can be assigned with. Level 7 is species level.
