# Supplementary material for: Diurnal and eating-associated microbial patterns revealed via high-frequency saliva sampling
Source: HighWire-hosted journal article supplement (doi:10.1101/gr.276482.121), 2022-06-01
Supplement: Supplemental_Figure_S5.pdf [file Supplemental_Figure_S5.pdf]

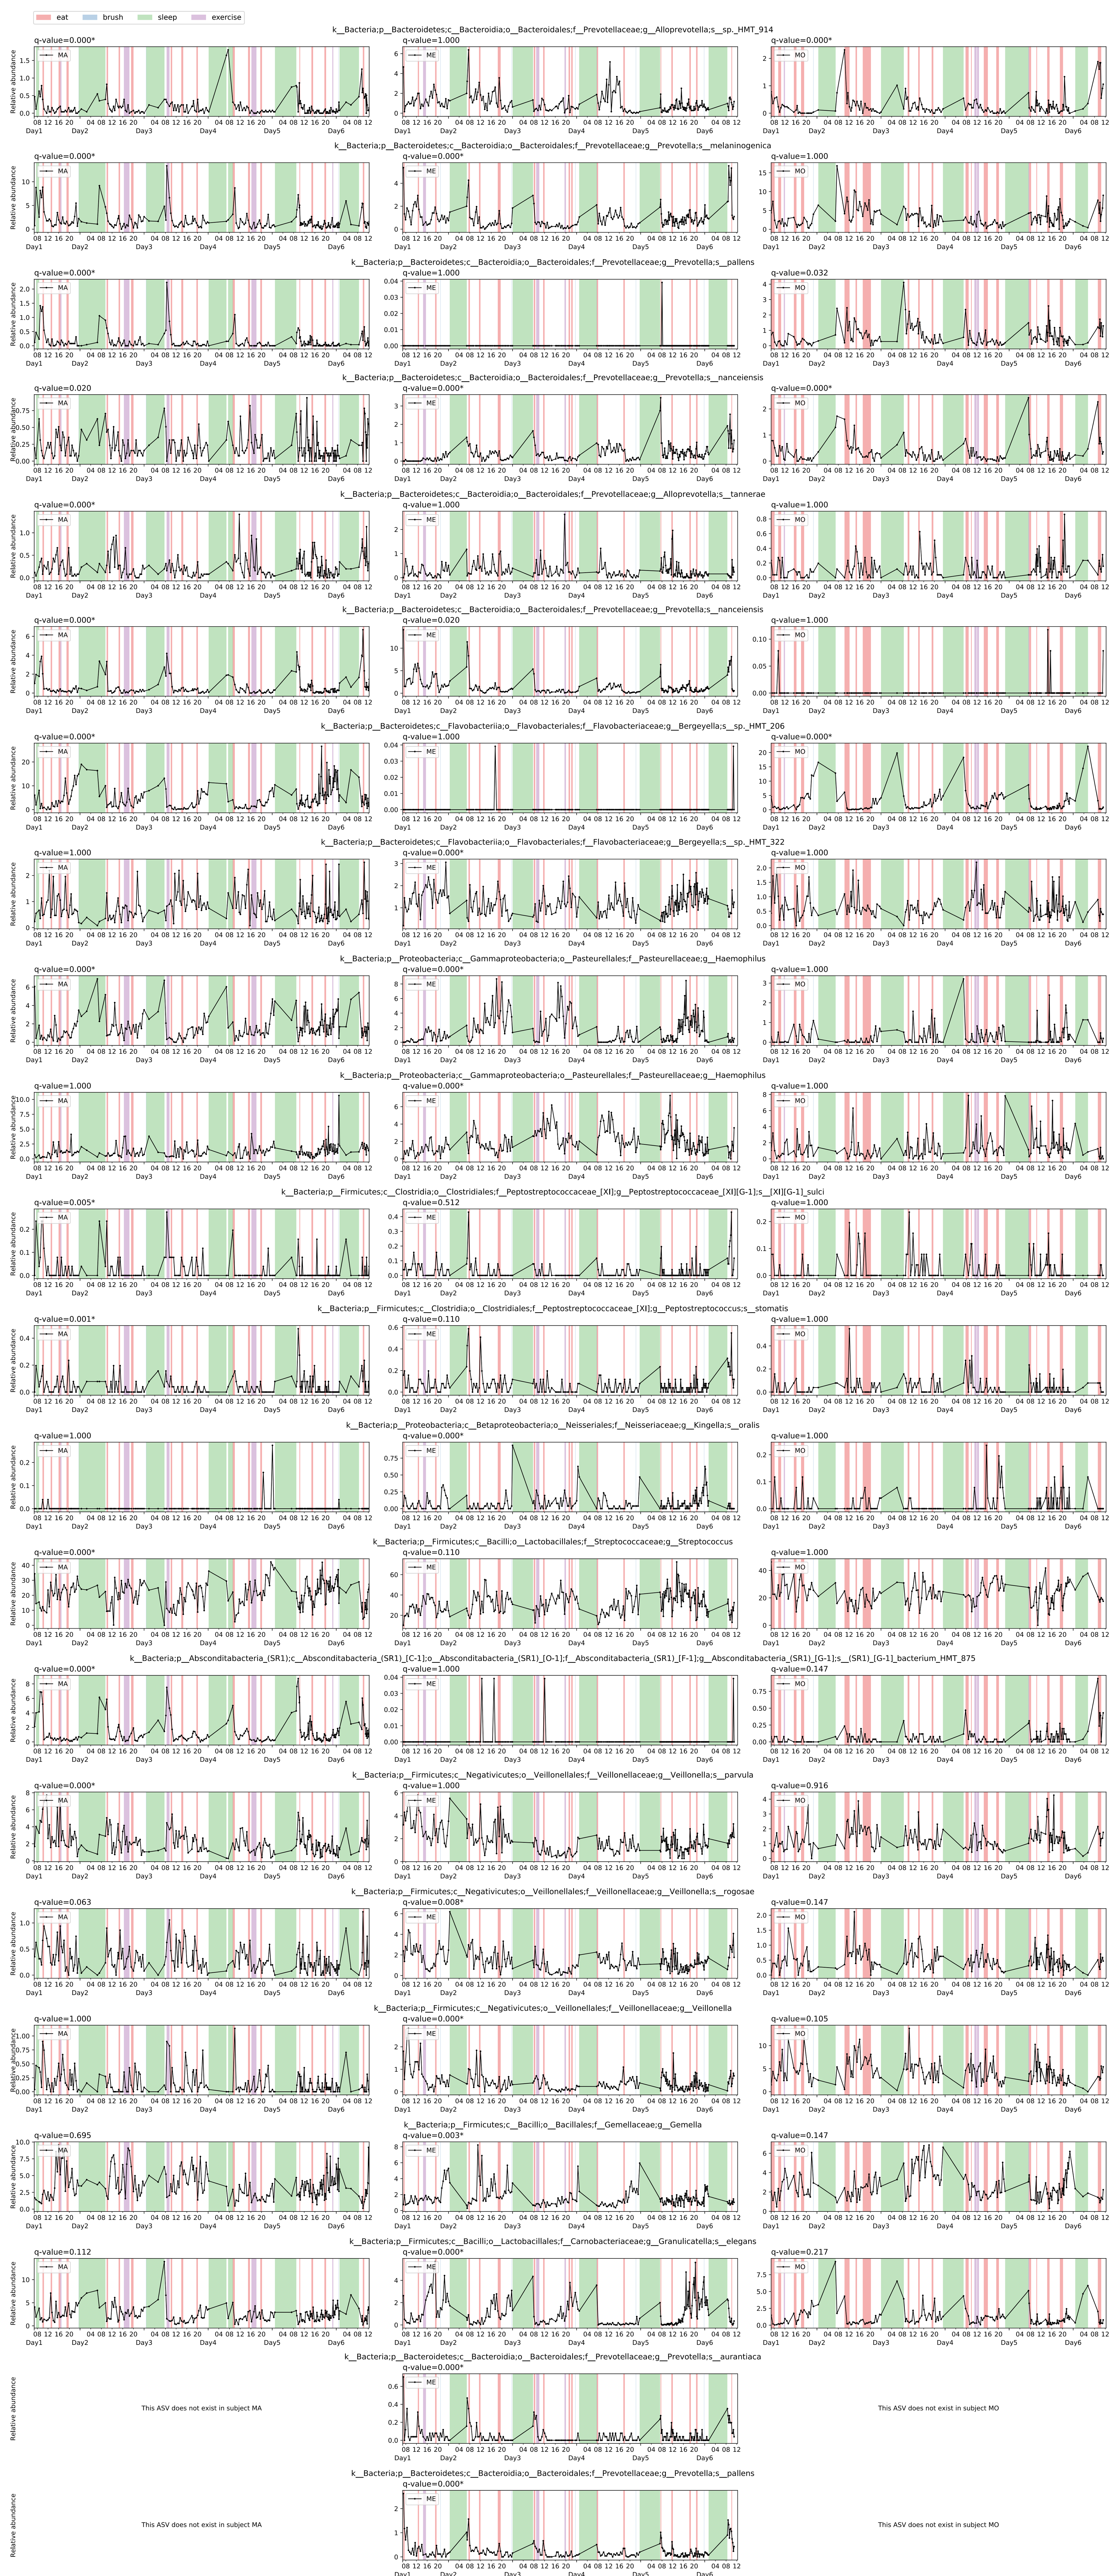

**Supplemental Figure S5.** Diurnal oscillating bacteria at ASV level. Each row represents an ASV. Each column represents an individual. The q-values of rhythmicity were shown above the trace plots.
