# Supplementary material for: Diurnal and eating-associated microbial patterns revealed via high-frequency saliva sampling
Source: HighWire-hosted journal article supplement (doi:10.1101/gr.276482.121), 2022-06-01
Supplement: Supplemental_Figure_S6.pdf [file Supplemental_Figure_S6.pdf]

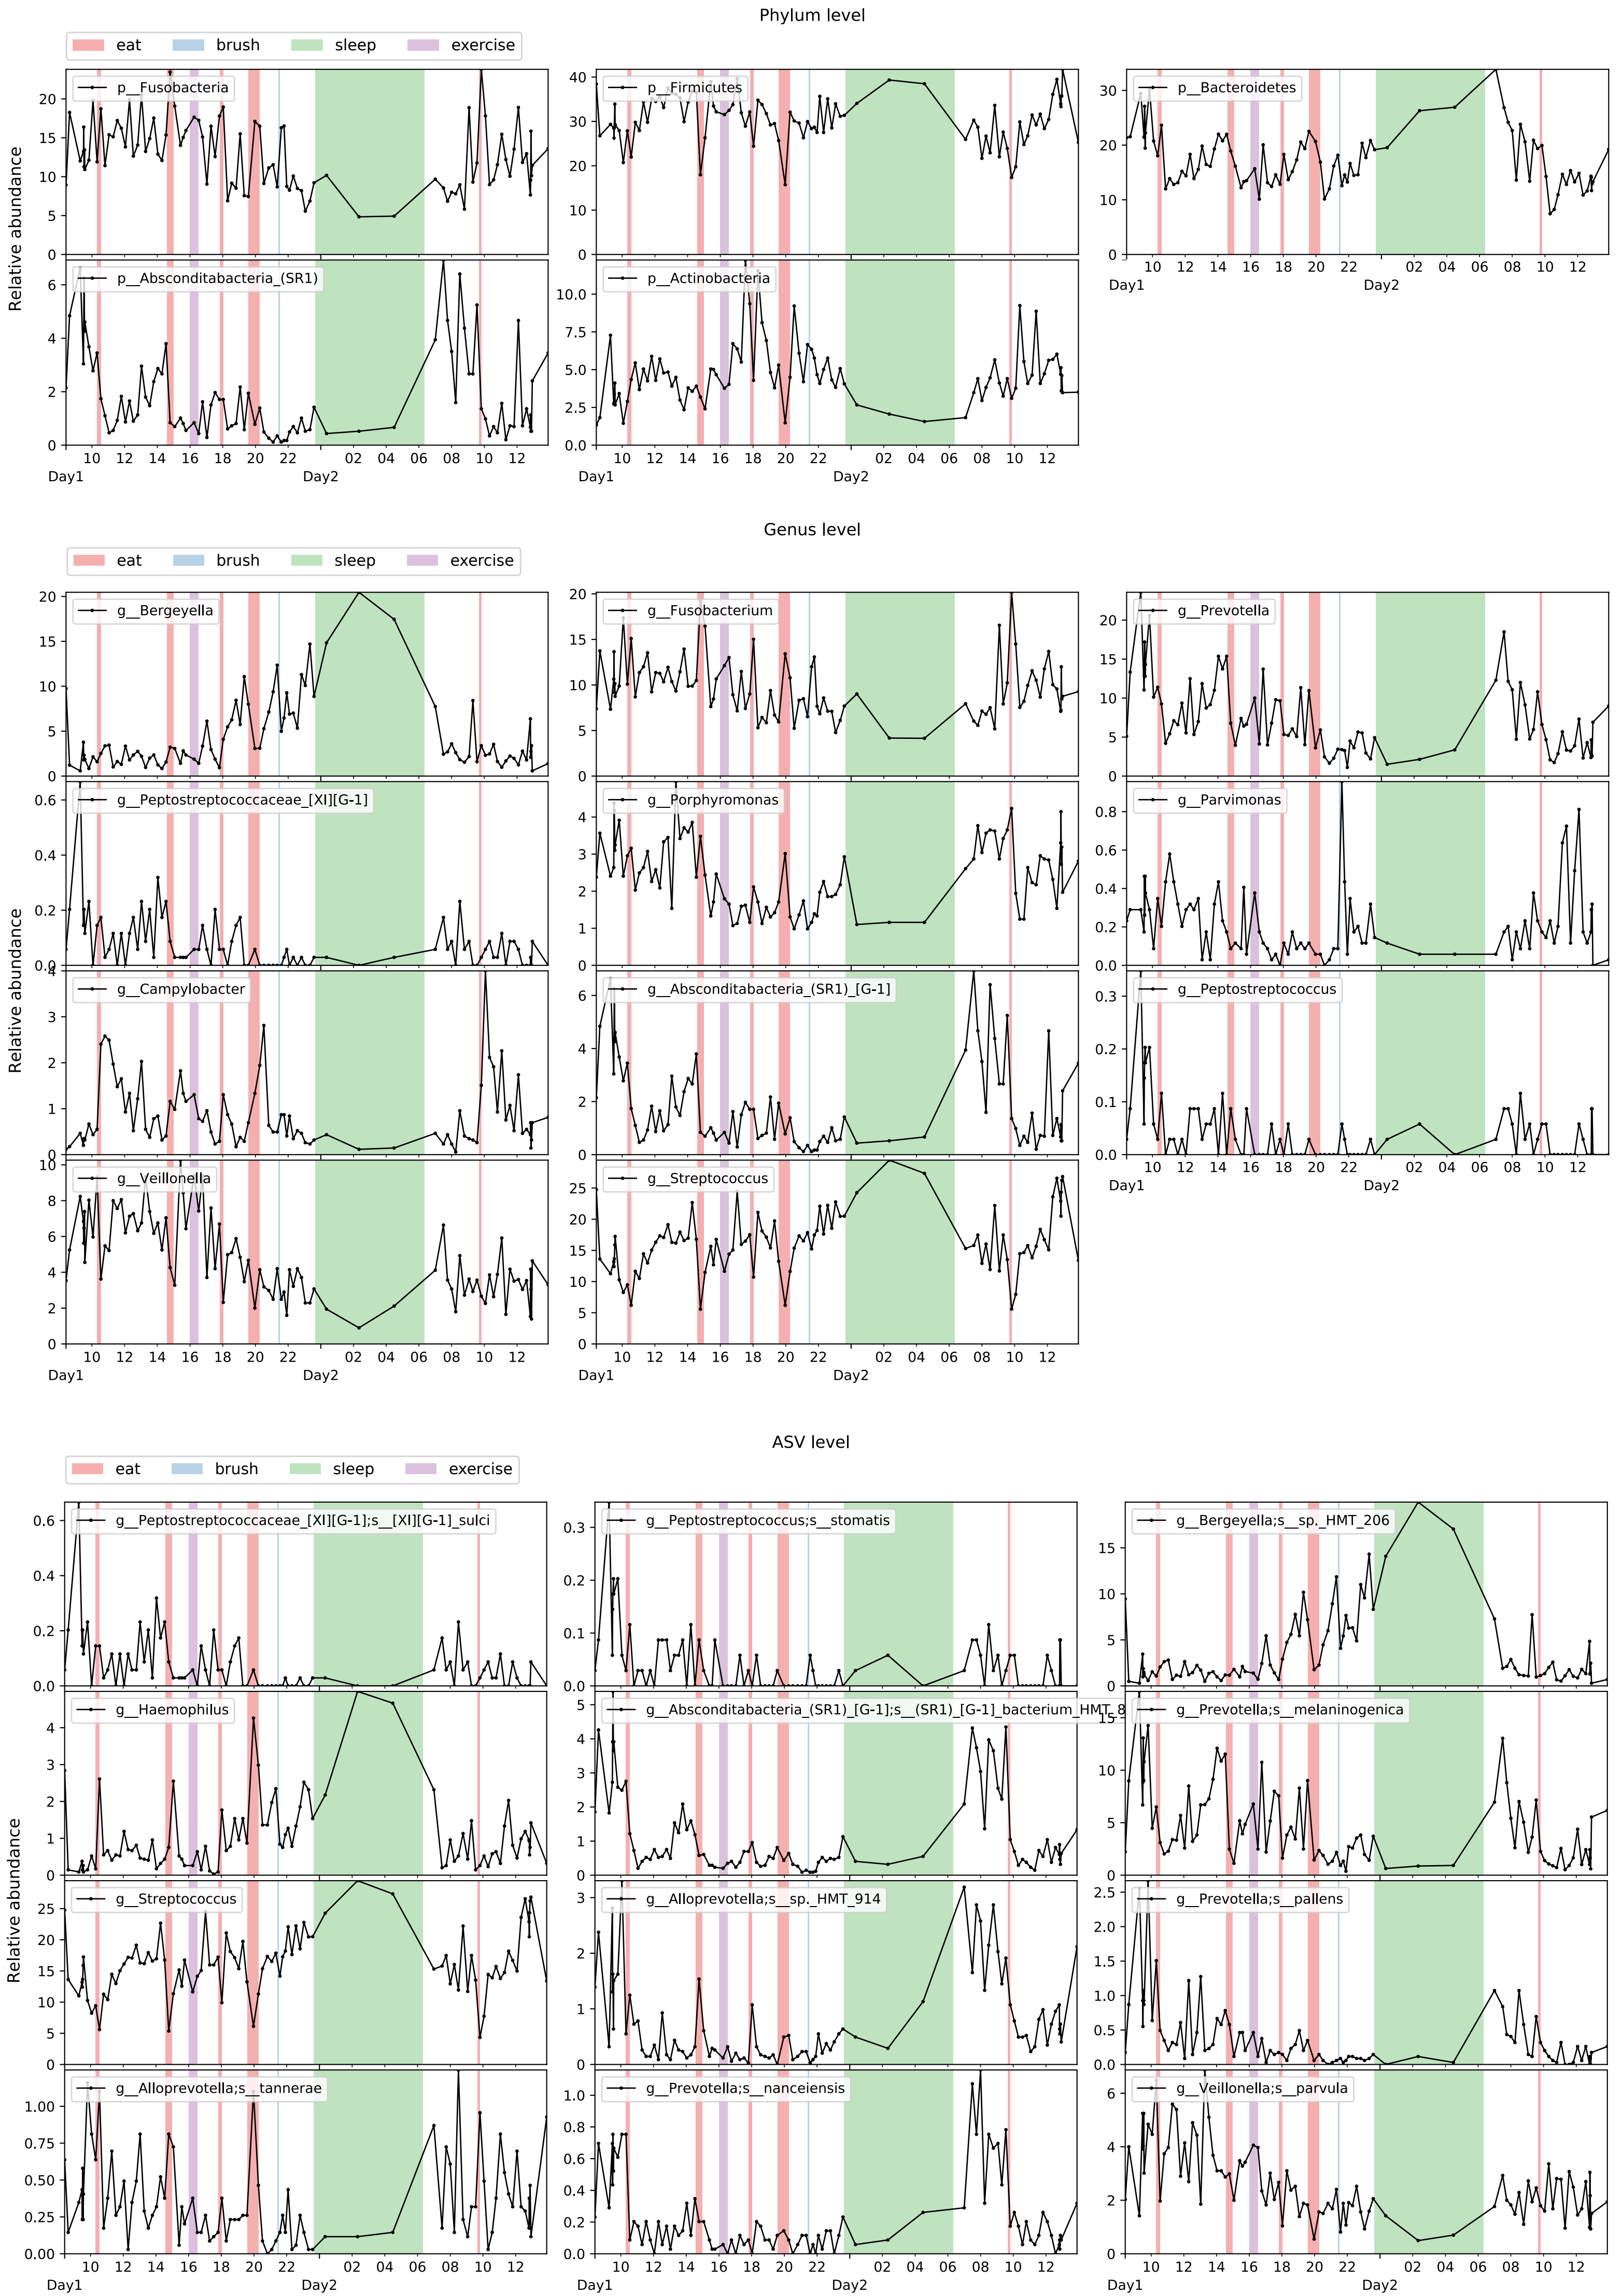

**Supplemental Figure S6.** Trace plots of diurnal oscillating phyla, genus and ASVs in the MA validation dataset.
