# Supplementary material for: Diurnal and eating-associated microbial patterns revealed via high-frequency saliva sampling
Source: HighWire-hosted journal article supplement (doi:10.1101/gr.276482.121), 2022-06-01
Supplement: Supplemental_Figure_S7.pdf [file Supplemental_Figure_S7.pdf]

MA

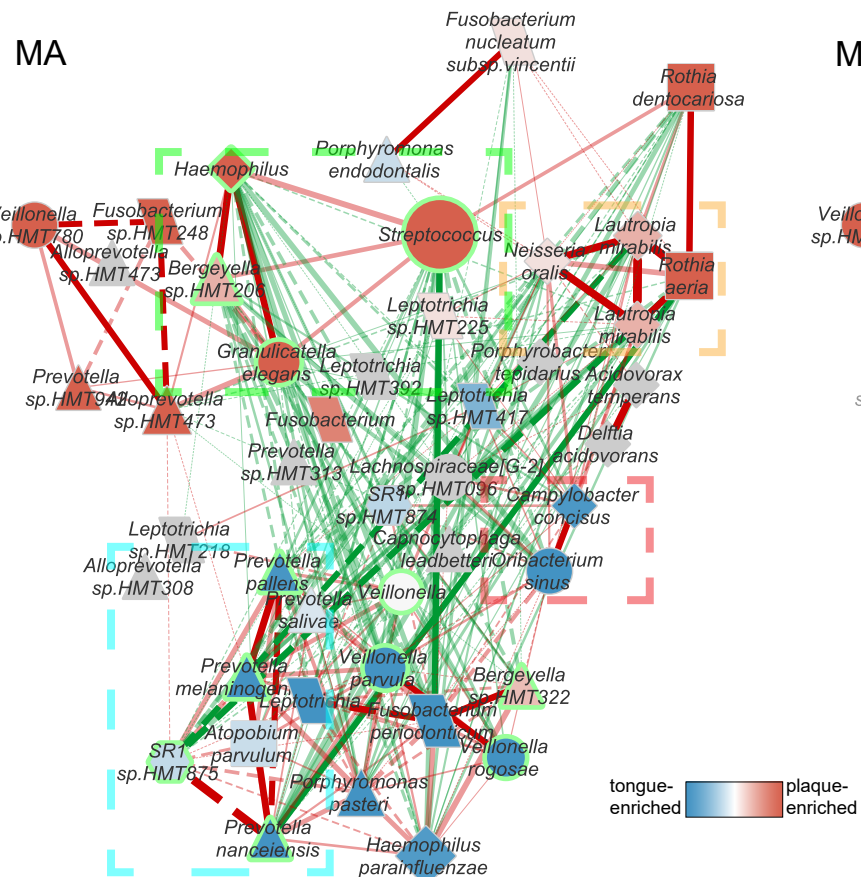

ME

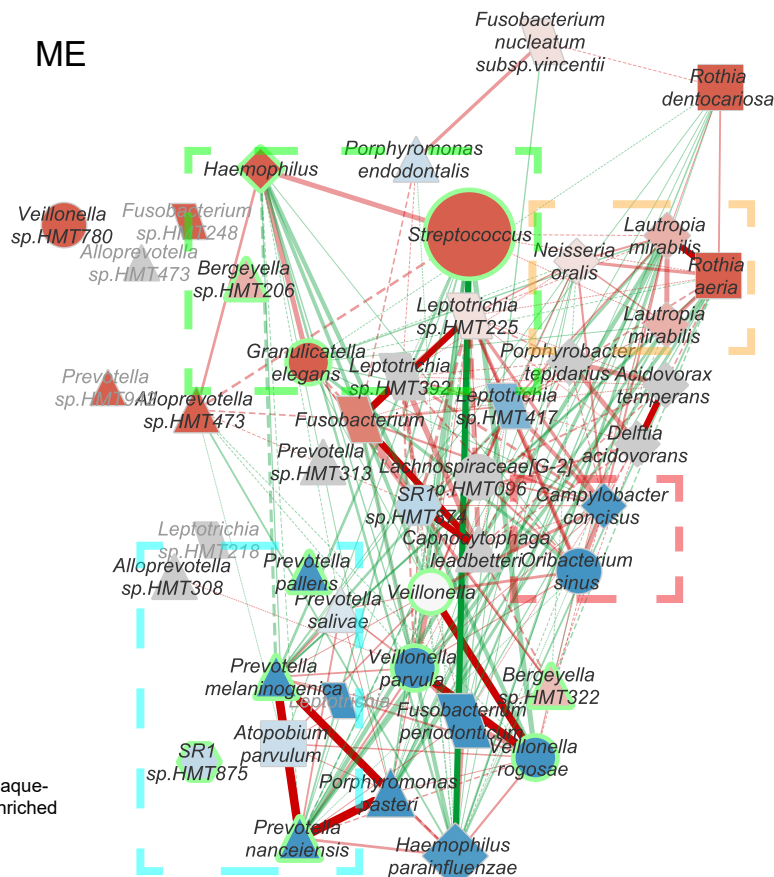

MO

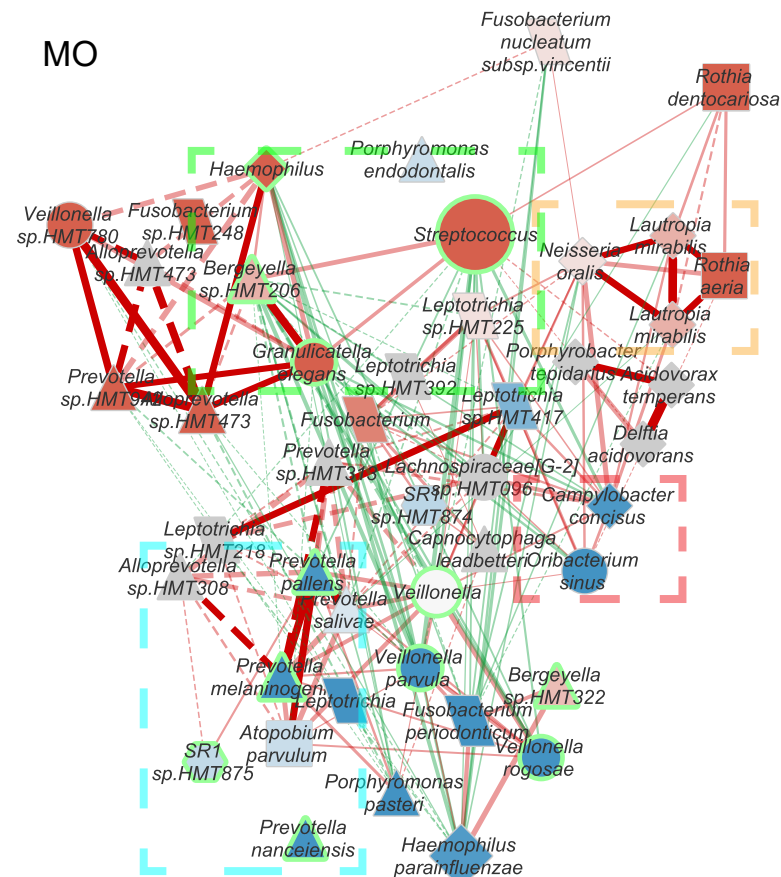

**Supplemental Figure S7.** Microbial co-occurrence networks computed with Spearman's correlation in three individuals. Red and green lines represent positive and negative correlations, respectively. Solid line indicates that the correlation of this pair exists in two or more individuals; dash line indicates that the significant correlation was only present in this subject. The size of the node is proportional to the average relative abundance. The shape of the node represents different phyla. The color of the node represents the site preference, where the blue indicates that the ASV is tongue-specific, and the red indicates the ASV is dental plaque-specific. Grey color means that its site information is not available based on our data. The bold fluorescent green circled nodes indicate diurnal oscillating ASVs. Grey-colored taxonomy labels indicate that the ASVs do not exist in the current subject.
