# Supplementary material for: Diurnal and eating-associated microbial patterns revealed via high-frequency saliva sampling
Source: HighWire-hosted journal article supplement (doi:10.1101/gr.276482.121), 2022-06-01
Supplement: Supplemental_Figure_S11.pdf [file Supplemental_Figure_S11.pdf]

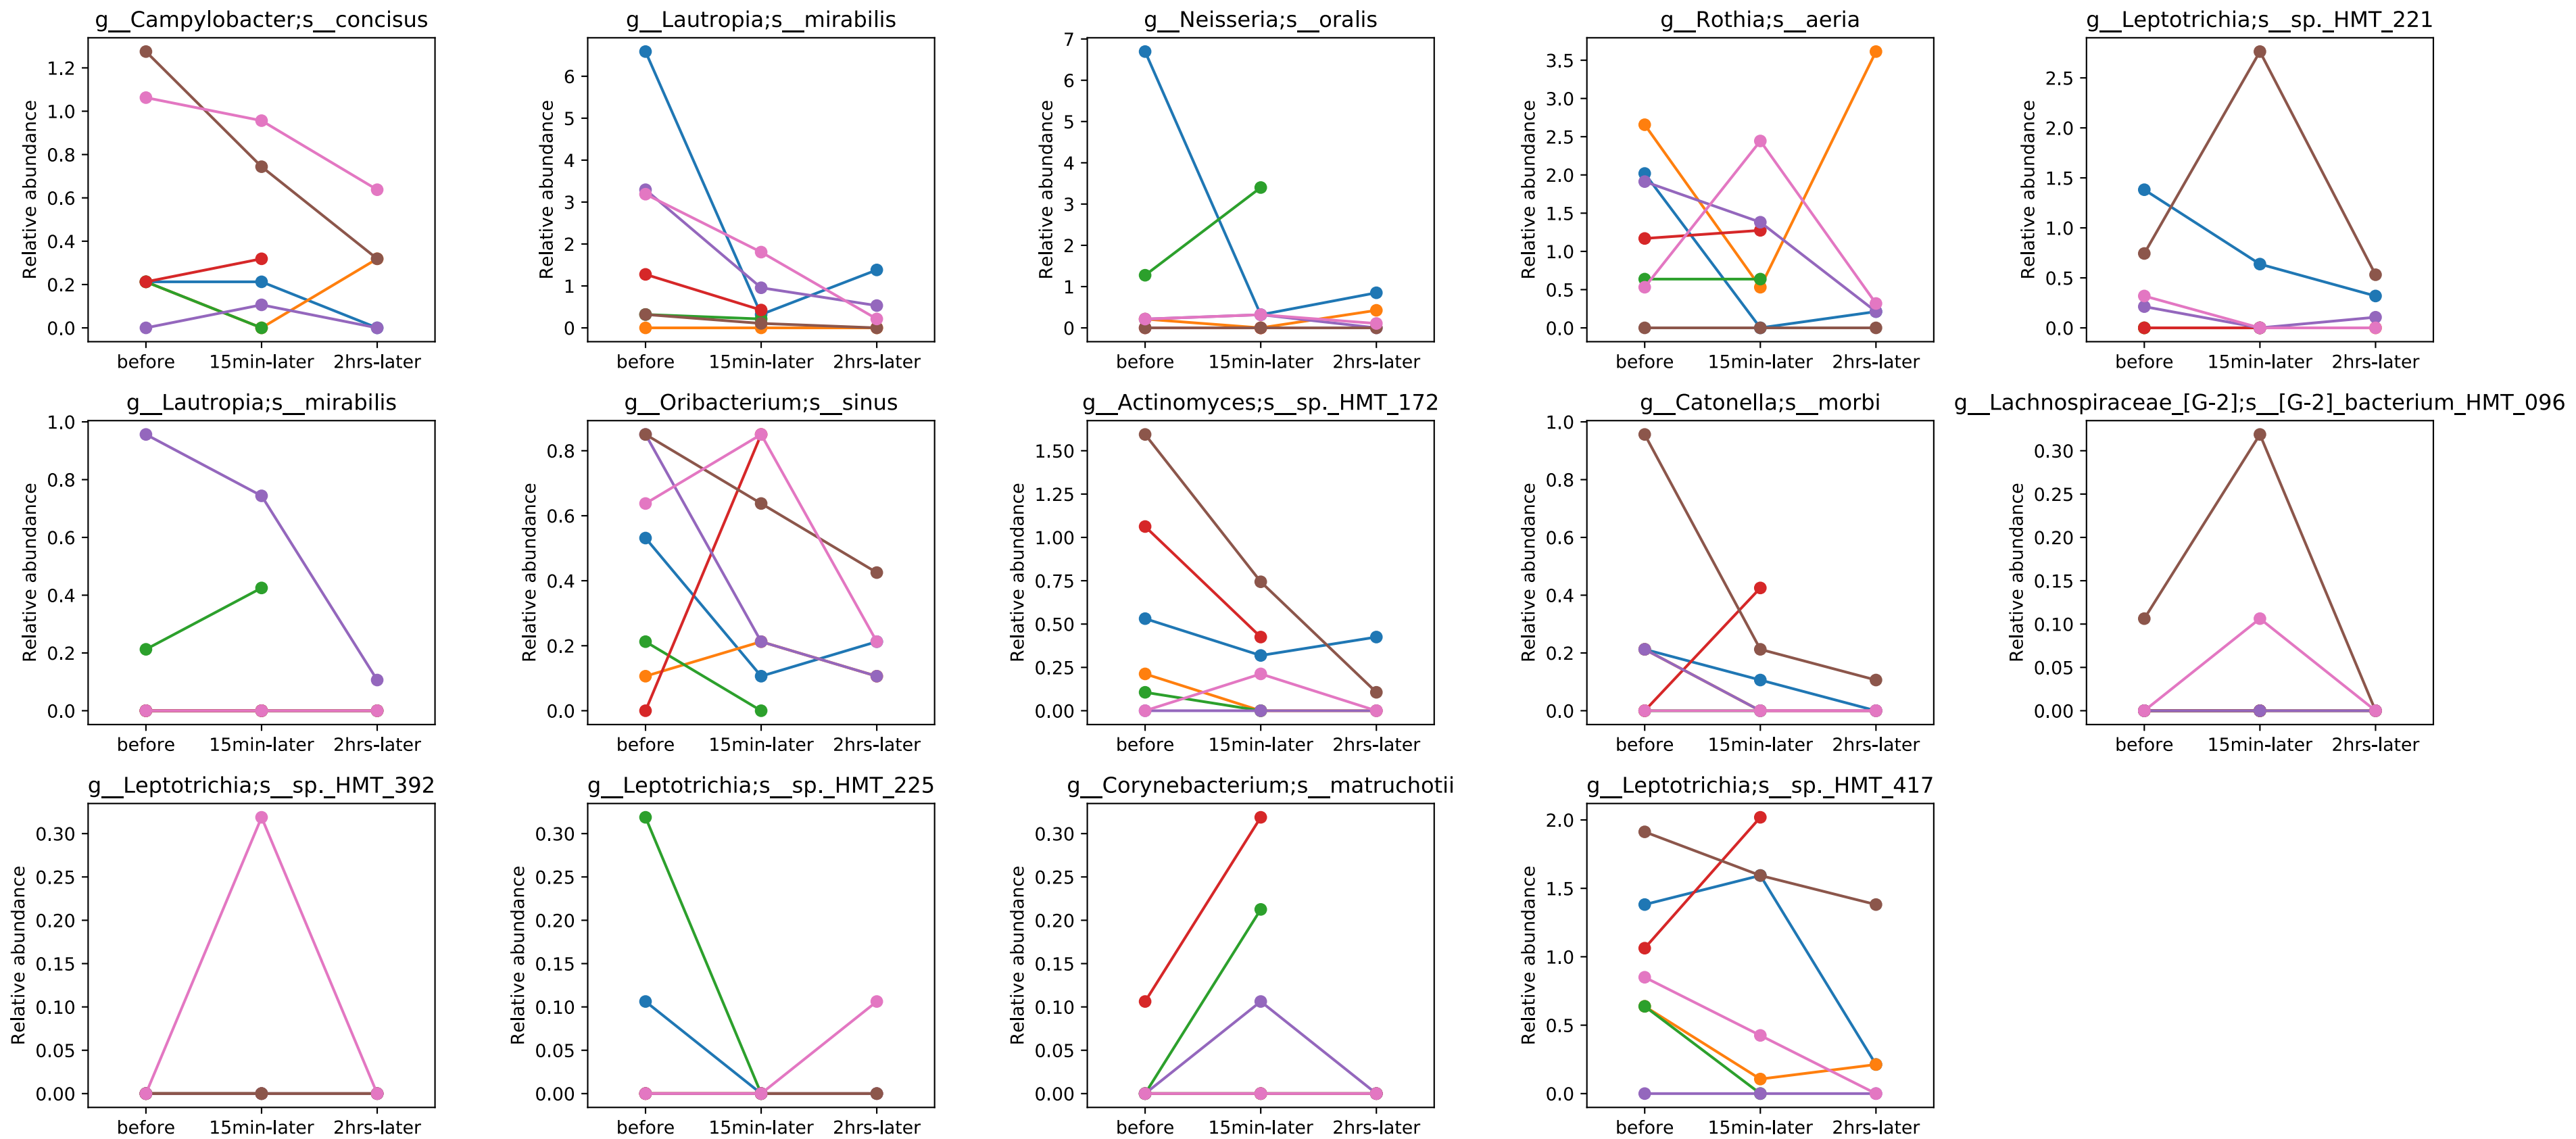

**Supplemental Figure S11.** None of the eating-responsive bacteria responded in soda intervention experiment. The relative abundances of eating-responsive ASVs with highest z-scores before and after the soda intervention were plotted.
