# Supplementary material for: Diurnal and eating-associated microbial patterns revealed via high-frequency saliva sampling
Source: HighWire-hosted journal article supplement (doi:10.1101/gr.276482.121), 2022-06-01
Supplement: Supplemental_Figure_S12.pdf [file Supplemental_Figure_S12.pdf]

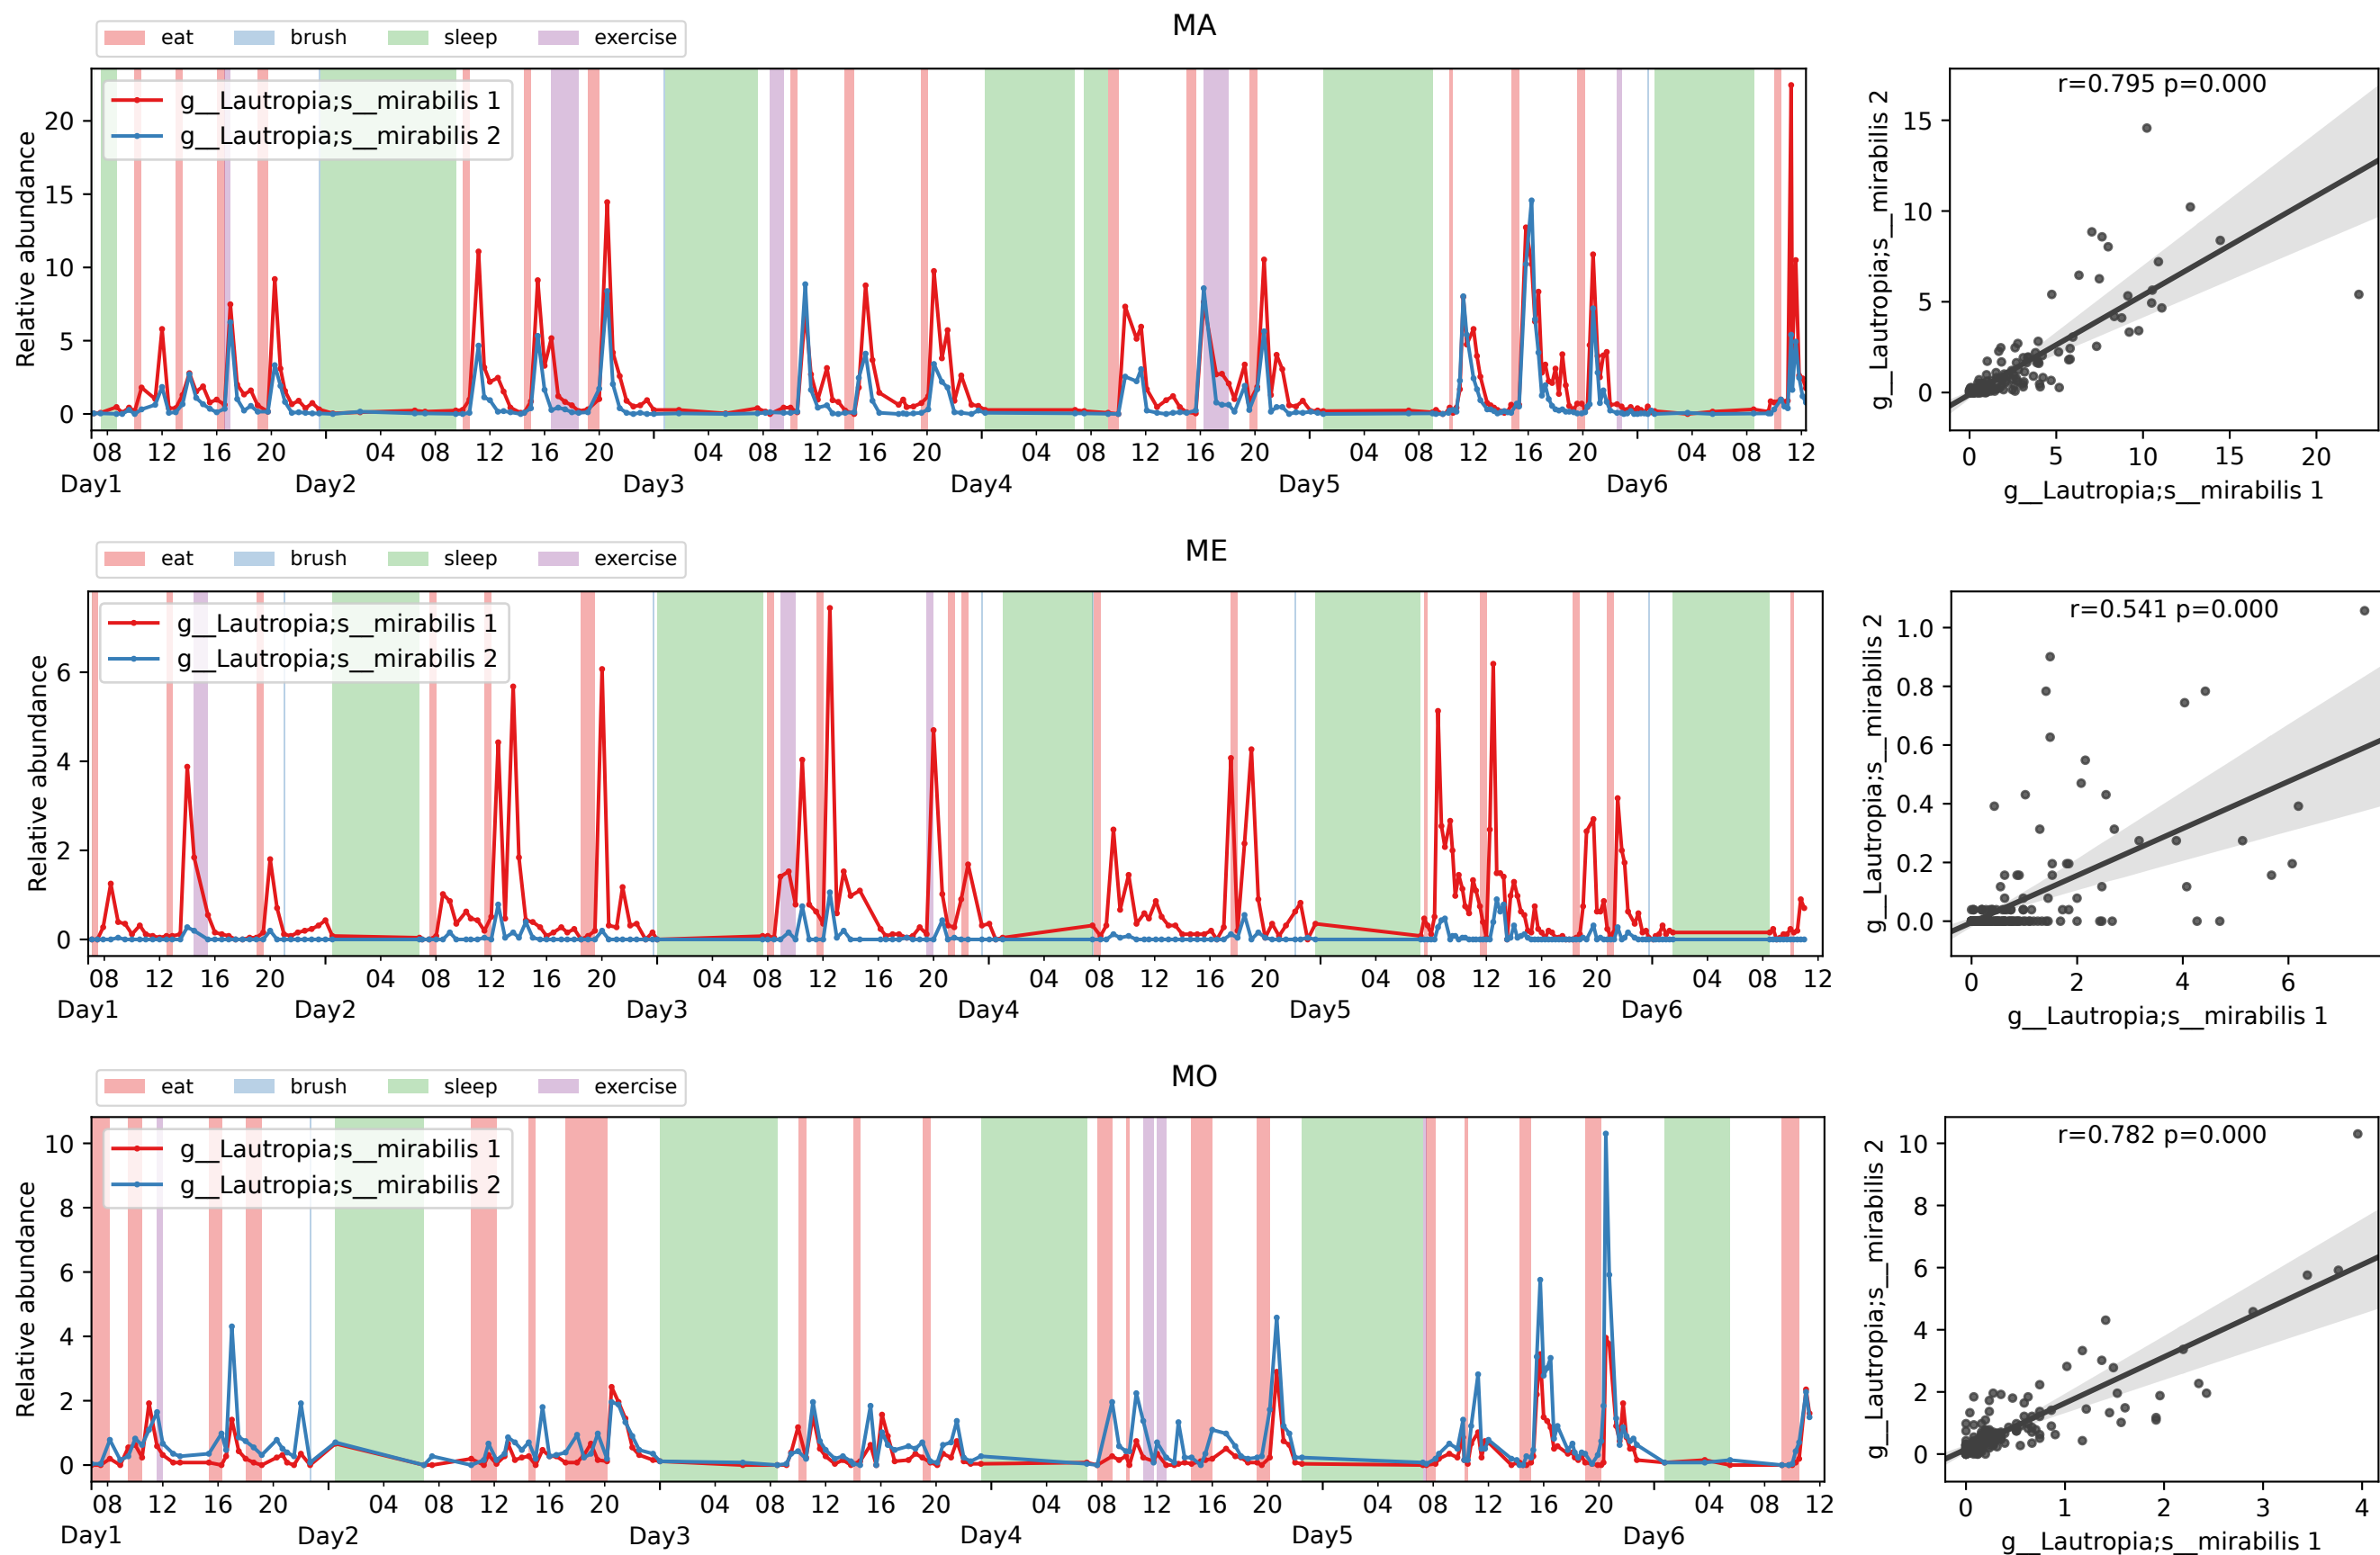

**Supplemental Figure S12.** Two *Lautropia mirabilis* that were closely associated are unlikely multiple copies from same strain. (left) Trace plots of two *L. mirabilis* in each individual. (right) Scatter plots of two *L. mirabilis* strains. Spearman's correlation coefficients and p-values are shown.
