# Supplementary material for: Diurnal and eating-associated microbial patterns revealed via high-frequency saliva sampling
Source: HighWire-hosted journal article supplement (doi:10.1101/gr.276482.121), 2022-06-01
Supplement: Supplemental_Figure_S13.pdf [file Supplemental_Figure_S13.pdf]

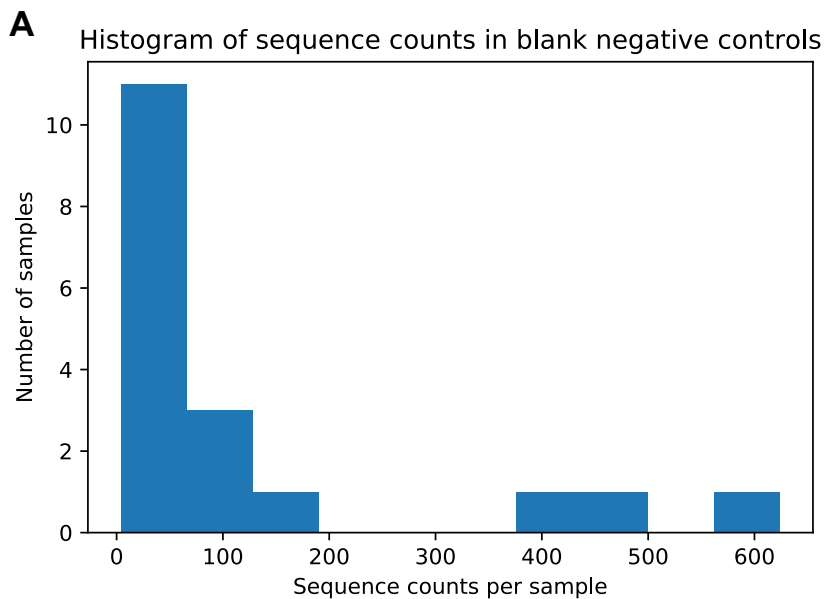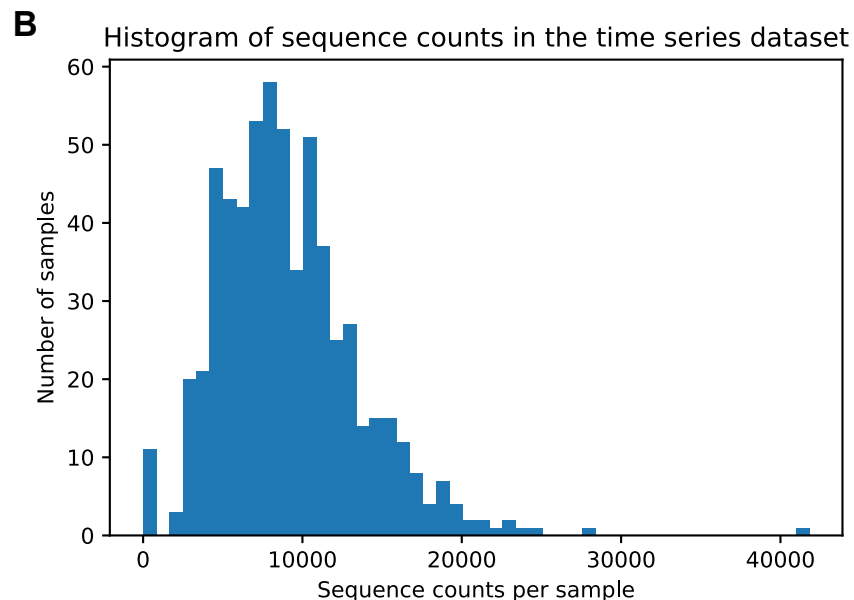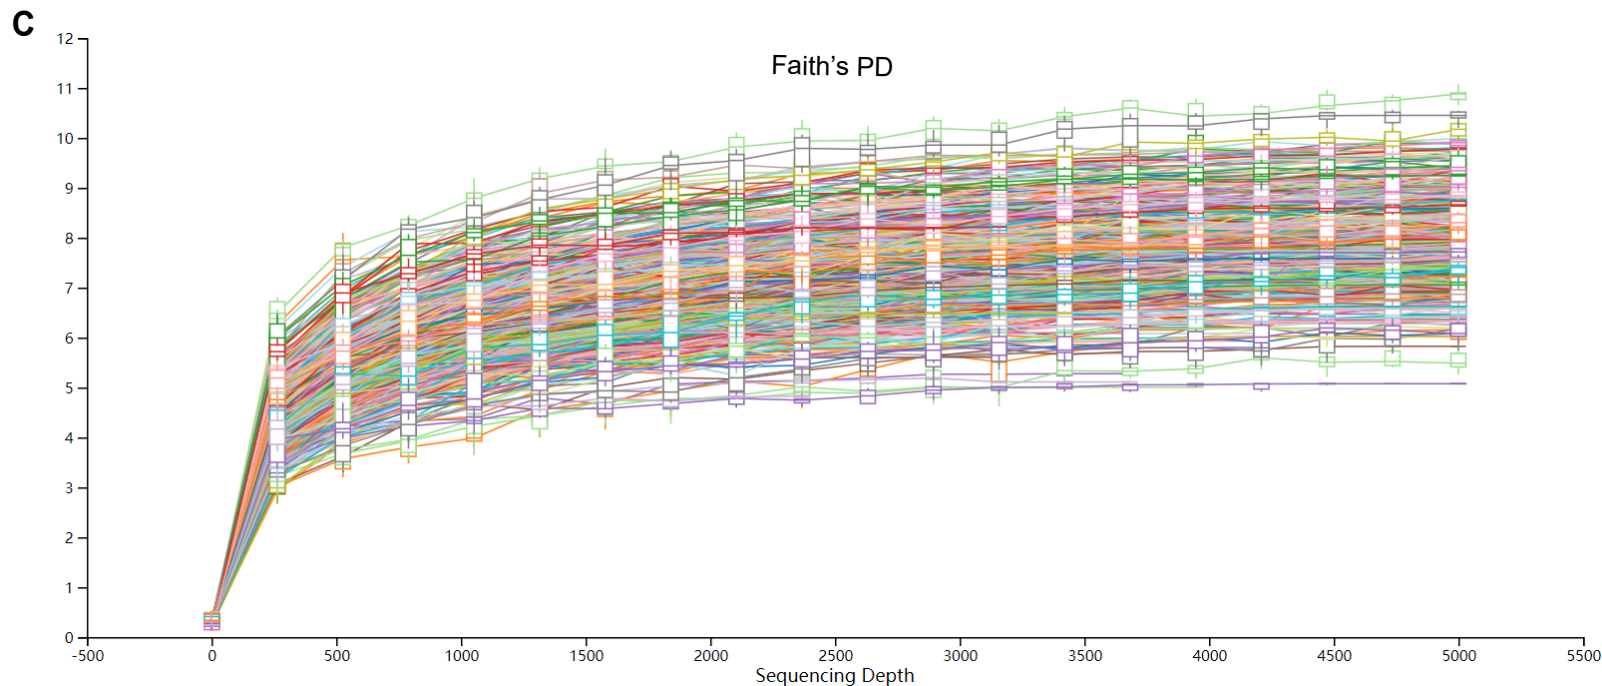

**Supplemental Figure S13.** Histogram of sequence counts per sample in time series dataset and rarefaction curve. (A) The distribution of sequences counts in blank negative controls. (B) The distribution of sequences counts in saliva samples in the time series dataset. (C) Rarefaction curve.
