# Supplementary material for: Diurnal and eating-associated microbial patterns revealed via high-frequency saliva sampling
Source: HighWire-hosted journal article supplement (doi:10.1101/gr.276482.121), 2022-06-01
Supplement: Supplemental_Table_S1.xlsx [file Supplemental_Table_S1.xlsx]

## Sheet: Sheet1
Supplemental Table S1. Participant demographics
Dataset	Time series	Lunch
Age (mean ± sd.)	35.6 ± 9.8	27.8 ± 4.9						(21-48)
Gender	1 female; 2 males	6 females; 13 males
Race	1 Asian; 2 Caucasian	3 Asian; 16 Caucasian
Sample collection month	September	September
Occupation	Researchers
Geography	Boulder, Colorado
	`
