# Supplementary figures and images for: Diurnal and eating-associated microbial patterns revealed via high-frequency saliva sampling
Source: HighWire-hosted journal article supplement (doi:10.1101/gr.276482.121), 2022-06-01

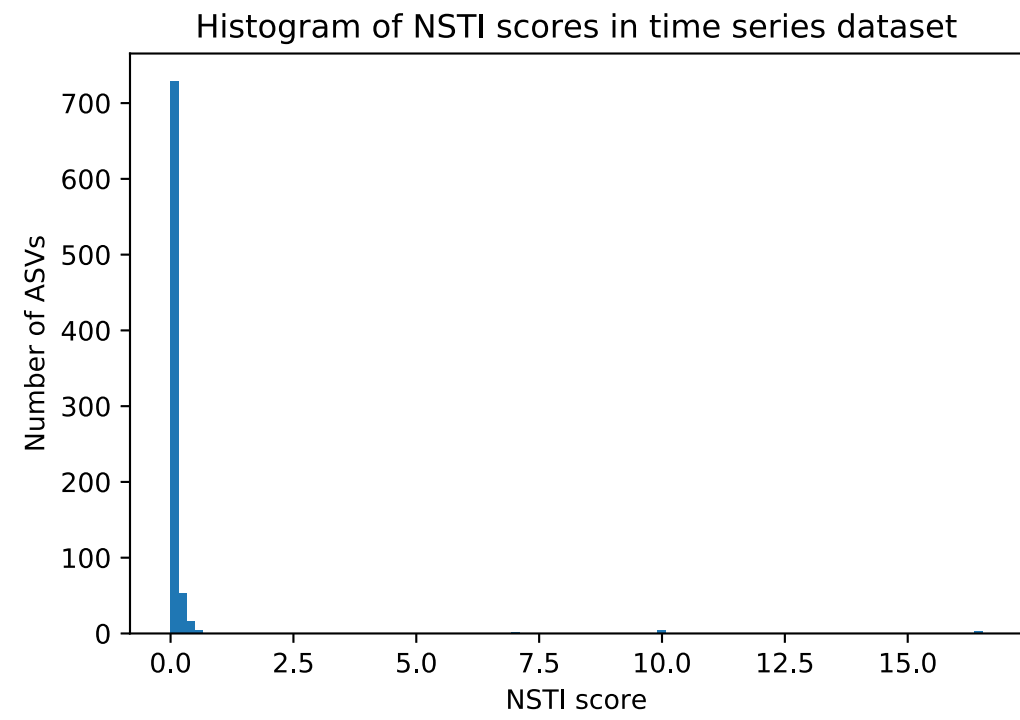

**Supplemental Figure S14.** The Distribution of the NSTI scores calculated by PICRUST2 analysis.

Supplement: Supplemental_Figure_S14.pdf [file Supplemental_Figure_S14.pdf]

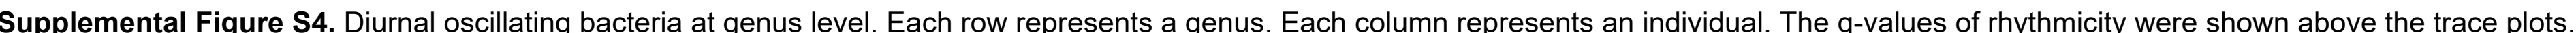

Supplement: Supplemental_Figure_S4.pdf [file Supplemental_Figure_S4.pdf]
